# Supplementary material
Source: PubMed Central journal article supplement (PMC5107128)
Supplement: NIHMS820658-supplement-1.pdf [file NIHMS820658-supplement-1.pdf]

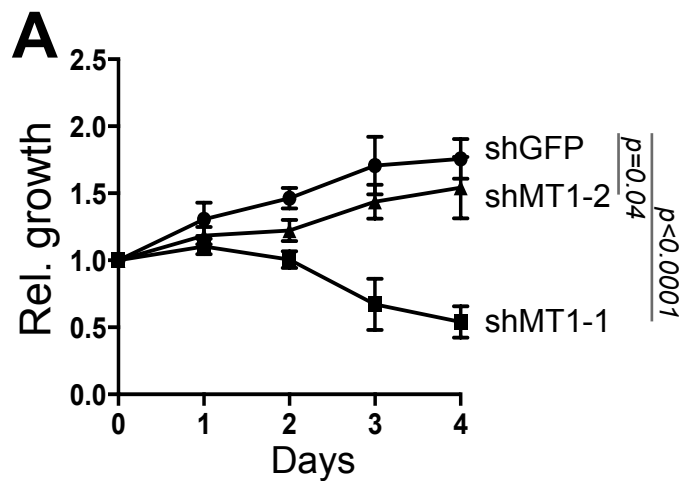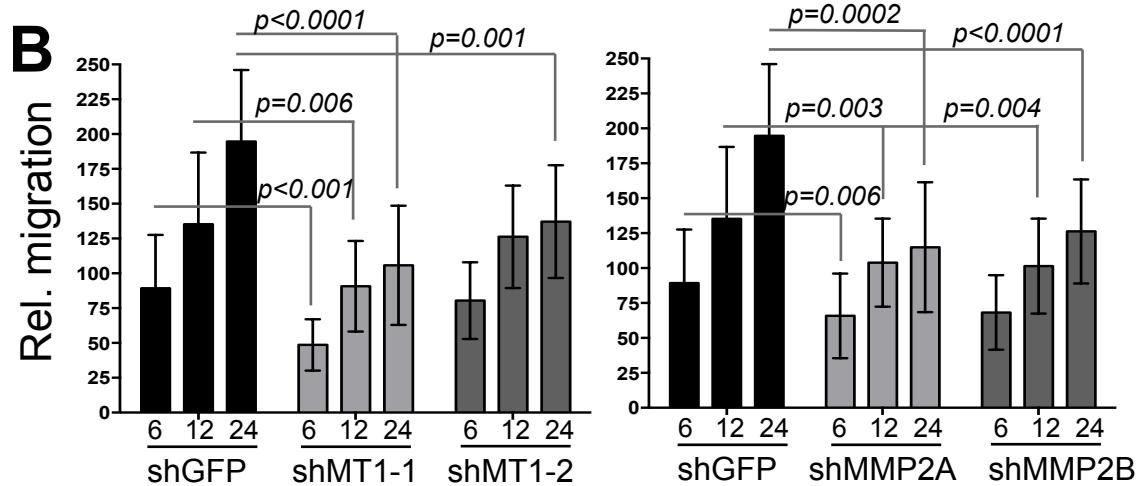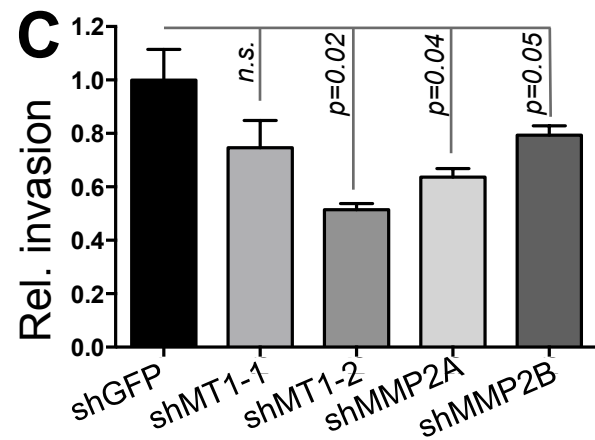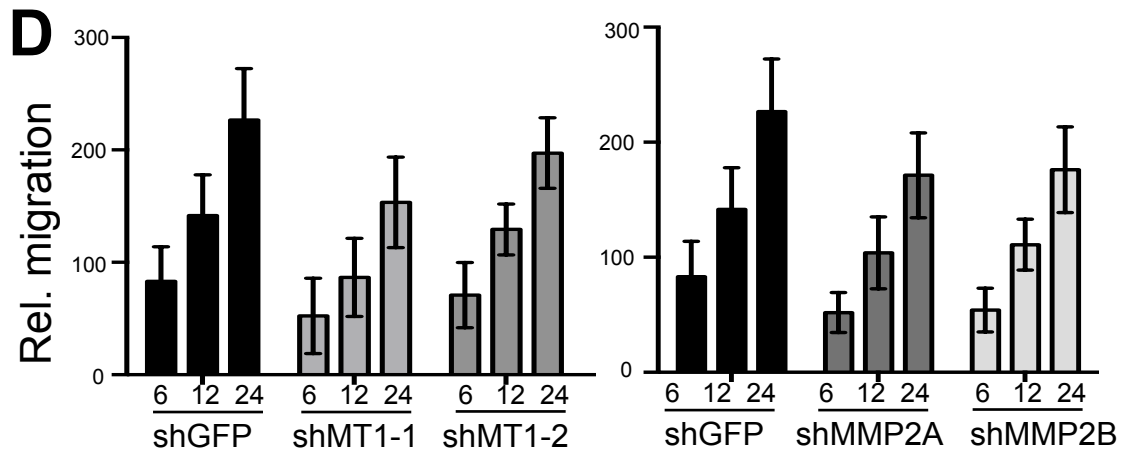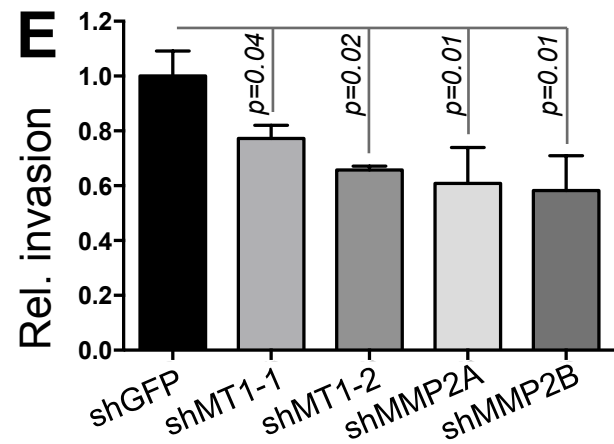

**Suppl. Fig. 2: A)** relative growth of A375 cells expressing two shRNAs against Mt1-MMP. **B)** Migration assay of A375 cells expressing two shRNAs against MT1-MMP or against MMP2. **C)** Invasion through matrigel of A375 cells expressing the same shRNAs. **D)** Migration assay of WM266-4 cells expressing two shRNAs against MT1-MMP or against MMP2. **E)** Invasion through matrigel of WM266-4 cells expressing the same shRNAs.
